# Supplementary material
Source: Springer Nature journal article supplement (https://www.springermedizin.de/resource/supplementary/12893_2010_184_MOESM1_ESM.pdf/9511742)

# X-SECTION

# DEFECT

# VOLUME OF INTEREST

CONTROL

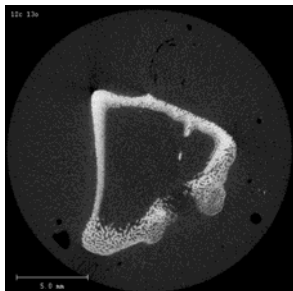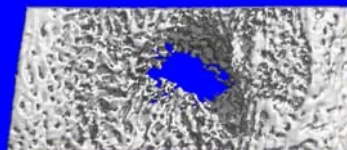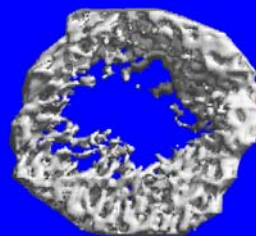

AOC

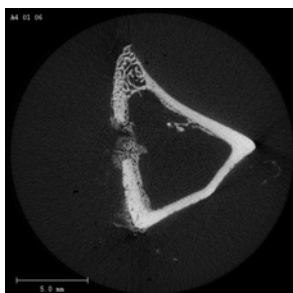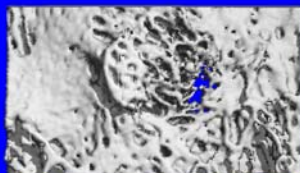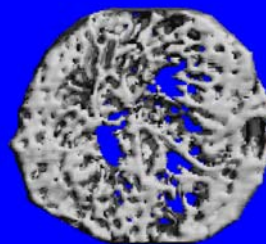

ORC

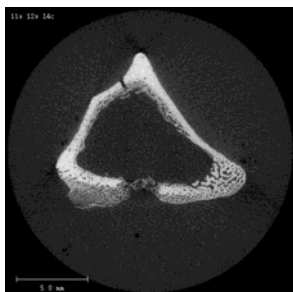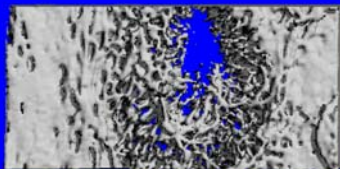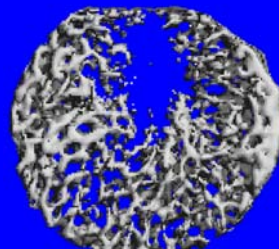

MFC

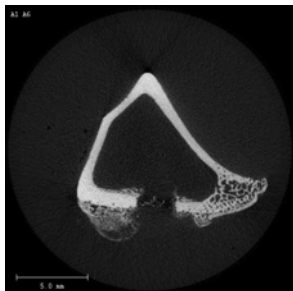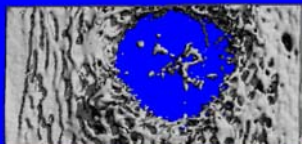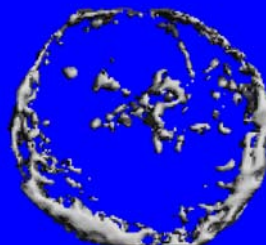

Supplement: MOESM1 [file 9511742]
